# Supplementary material for: Laquinimod Therapy in Multiple Sclerosis: A Comprehensive Review
Source: PubMed Central journal article supplement — Neurol Ther. 2014 May 6;3(1):29–39. doi: 10.1007/s40120-014-0017-6 (PMC4381916; doi:10.1007/s40120-014-0017-6), 2014-05-06
Supplement: 40120_2014_17_MOESM1_ESM.pdf [file 40120_2014_17_MOESM1_ESM.pdf]

- The available disease-modifying therapies approved to treat multiple sclerosis (MS) have only shown partial benefit in controlling the disease progression.
- Laquinimod is a promising new oral drug recently evaluated in a third phase III clinical trial that demonstrated beneficial effects in delaying disease progression and preventing brain atrophy, suggesting a potential neuroprotective effect and a favorable safety profile.
- It has been shown to have a novel immunomodulatory and potential neuroprotective mechanism of action as suggested from animal models and *in vitro* experimental data.
- Phase III clinical trials ALLEGRO (Clinicaltrials.gov #NCT00509145) and BRAVO (Clinicaltrials.gov #NCT00605215) have demonstrated clinical efficacy and tolerability, while the third phase III study is currently evaluating the safety and efficacy of laquinimod at a higher dosage.
- Emerging oral treatments like laquinimod will provide new options for patients to consider that can lead to better patient adherence and improved outcomes.

This summary slide represents the opinions of the authors. No funding or sponsorship was received for this study or publication of this article. For a full list of acknowledgments and conflicts of interest for all authors of this article, please see the full text online. Copyright © The Author(s) 2014. Creative Commons Attribution Noncommercial License (CC BY-NC).
